# Supplementary material
Source: HighWire-hosted journal article supplement (https://qualitysafety.bmj.com/highwire/filestream/161897/field_highwire_adjunct_files/3/bmjqs-2021-014472supp004_data_supplement.pdf)
Supplement: bmjqs-2021-014472supp004_data_supplement.pdf [file bmjqs-2021-014472supp004_data_supplement.pdf]

## Toolbox

### Content of Toolbox

In this toolbox we offer starting points for quality improvement initiatives based on the currently available literature. The chapters are ordered according to the performance outcomes as offered in the monthly feedback. It is noted that this is not an exhaustive list.

We advise to implement quality improvement initiatives according to the Plan-Do-Check-Act cycle.

|                         |   |
|-------------------------|---|
| Plan-Do-Check-Act cycle | 2 |
|-------------------------|---|

#### Performance outcomes

- |                                                              |    |
|--------------------------------------------------------------|----|
| • 1-year revision rate due to infection (THA & TKA)          | 3  |
| • 1-year revision rate due to prosthesis loosening (THA&TKA) | 5  |
| • 1-year revision rate due to dislocation (THA)              | 7  |
| • 1-year revision rate due to technical failure (TKA)        | 9  |
| • Length-of-stay in hospital                                 | 11 |
| • Readmissions                                               | 13 |
| • Textbook Outcome & Ordinal Composite Outcome Measure       | 15 |
